# Supplementary material
Source: MDPI journal article supplement (https://www.mdpi.com/2673-8023/3/1/3)
Supplement: s1 [file s1 › micro-2045863-supplementary.pdf]

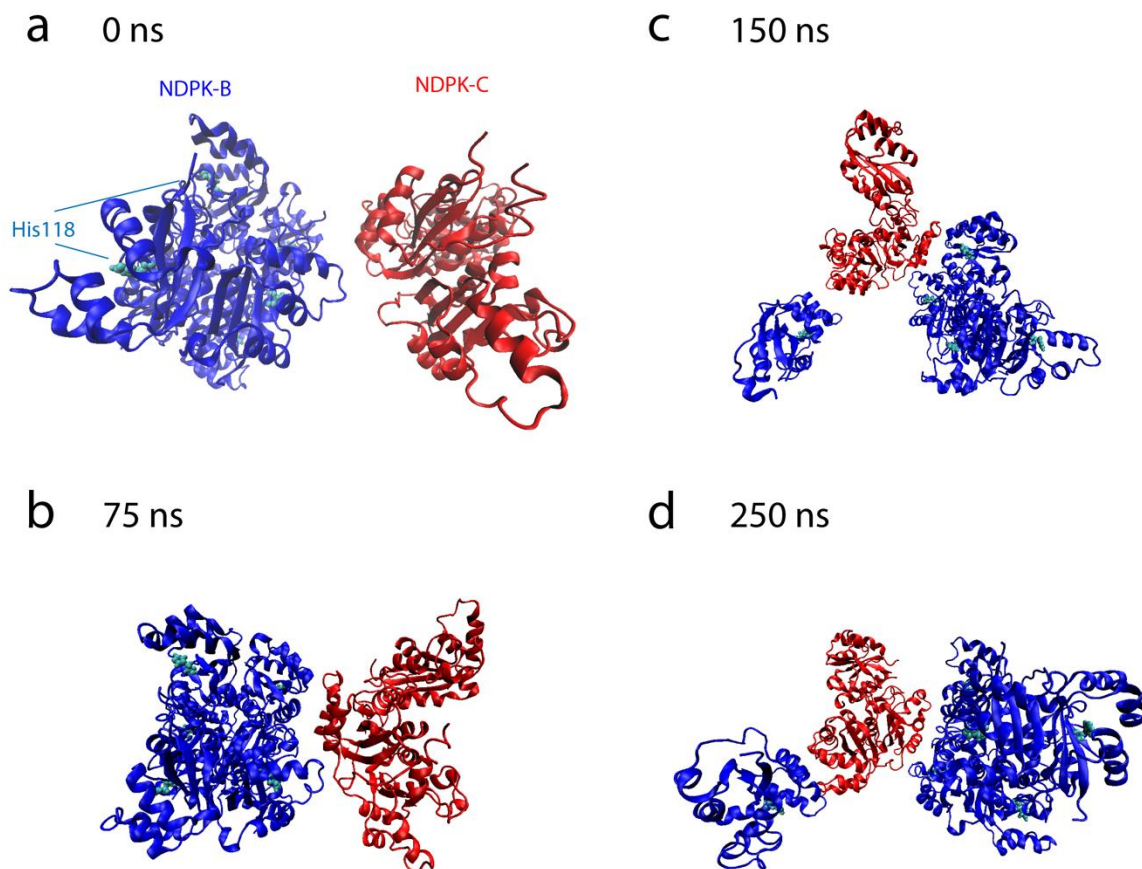

**Figure S1. Screenshots of the NDPK-BC system at four points throughout the simulation: (a)** 0 ns; (b) 75 ns; (c) 150 ns; (d) 250 ns. The position of the observer remains the same for all four screenshots.

a 0 ns

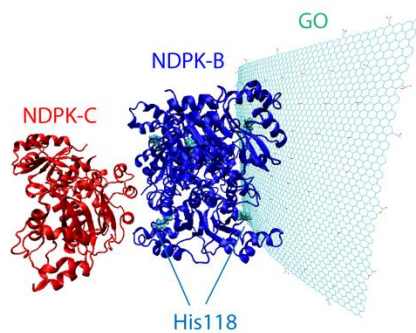

c 150 ns

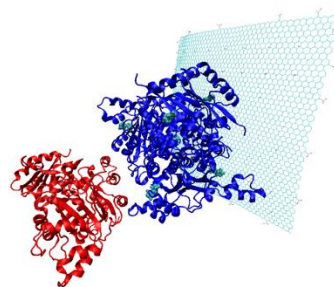

b 75 ns

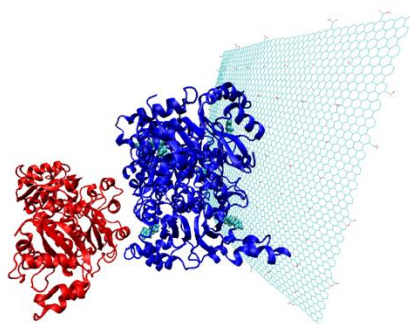

d 250 ns

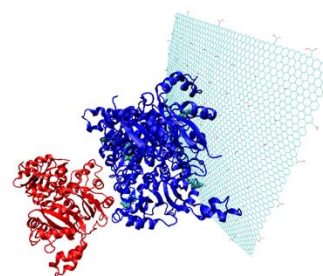

**Figure S2. Screenshots of the NDPK-BC system in the presence of GO at four points throughout the simulation: (a) 0 ns; (b) 75 ns; (c) 150 ns; (d) 250 ns. The position of the observer remains the same for all four screenshots.**

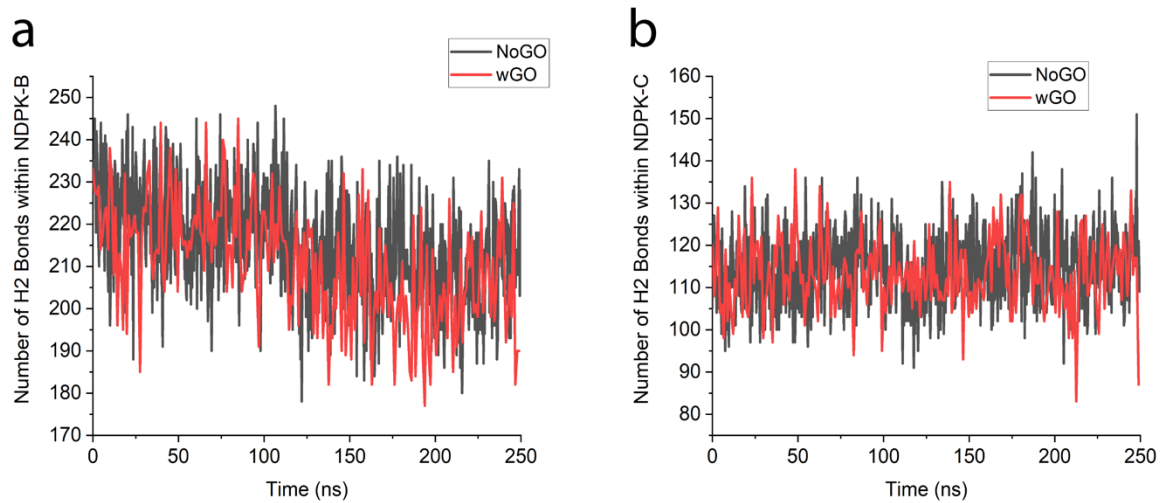

**Figure S3. Number of intramolecular hydrogen bonds within: (a) NDPK-B; (b) NDPK-C.**

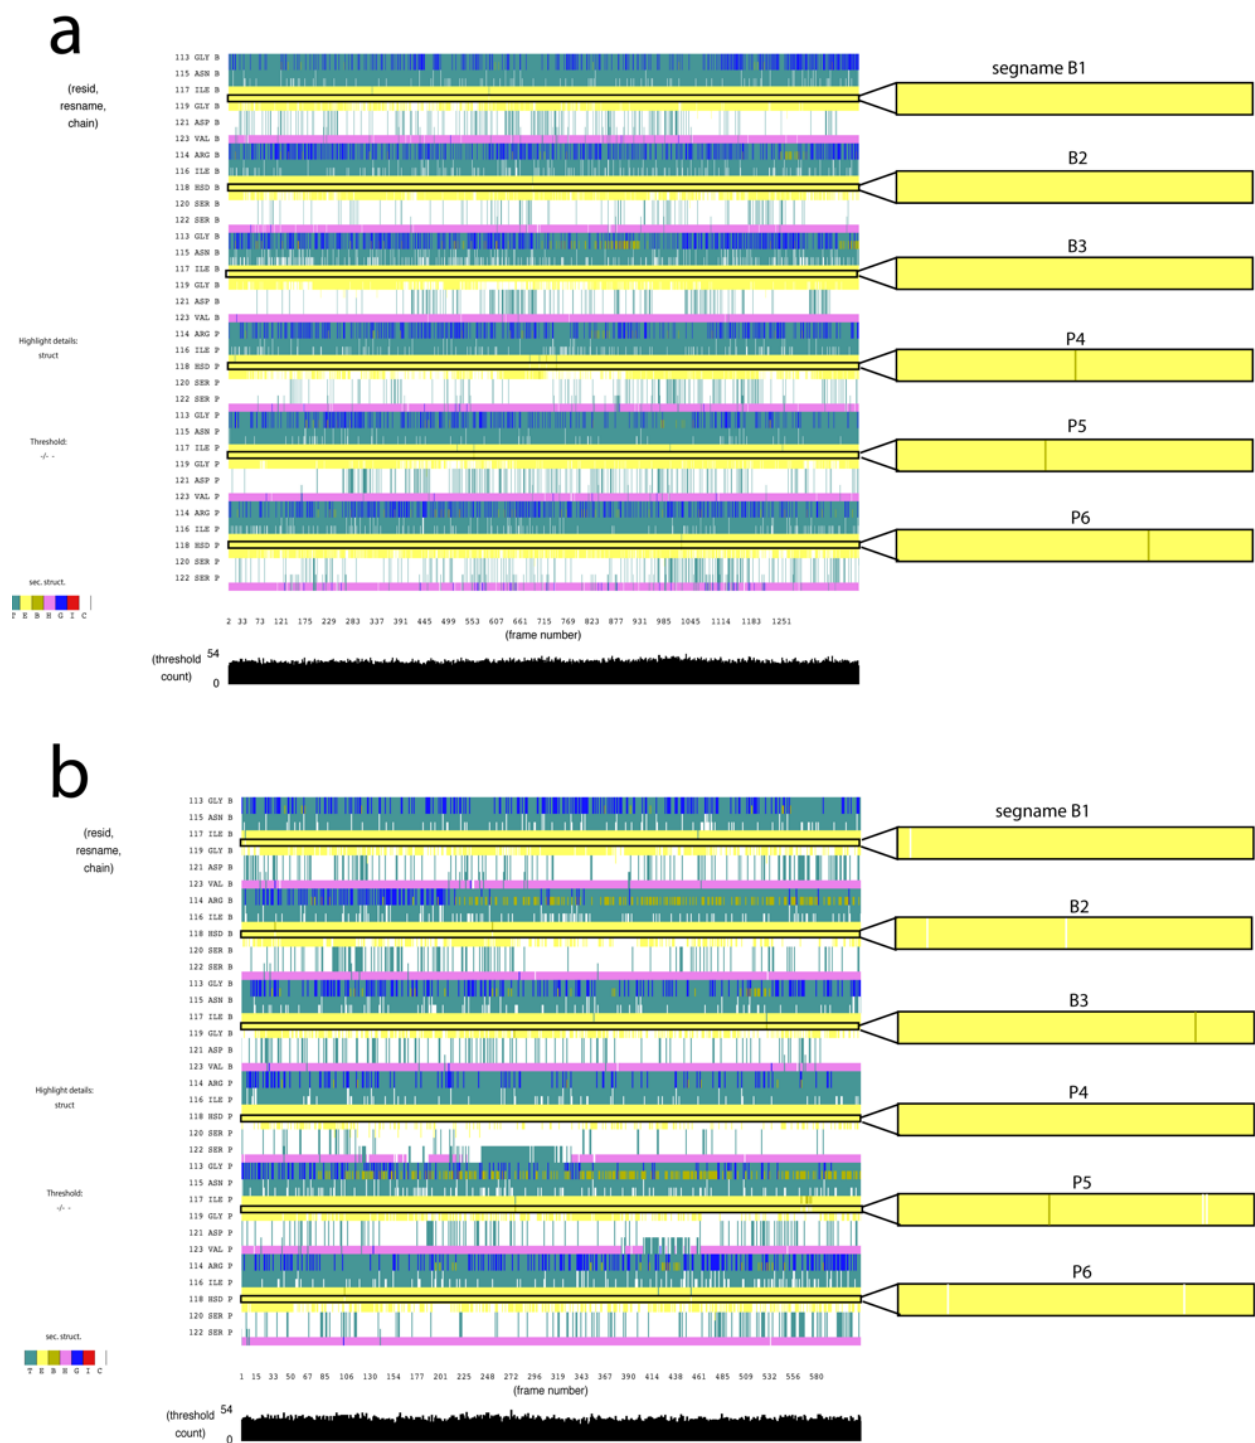

**Figure S4. Secondary structure analysis of six His118 residues of NDPK-B measured along with 5 residues in vicinity, zoomed in on His118: (a) in the absence of GO; (b) in the presence of GO.**

**Table S1.** Intramolecular salt bridges within NDPK-B

| <b>Salt bridge type</b> | <b>Without GO</b> | <b>With GO</b> |
|-------------------------|-------------------|----------------|
| <i>Broken</i>           | 98                | 82             |
| <i>Formed</i>           | 61                | 71             |
| <i>Sustained</i>        | 14                | 19             |
| <i>Weak</i>             | 31                | 22             |

**Table S2.** Intramolecular salt bridges within NDPK-C

| <b>Salt bridge type</b> | <b>Without GO</b> | <b>With GO</b> |
|-------------------------|-------------------|----------------|
| <i>Broken</i>           | 38                | 41             |
| <i>Formed</i>           | 31                | 39             |
| <i>Sustained</i>        | 13                | 10             |
| <i>Weak</i>             | 21                | 16             |
